# Supplementary material
Source: ML conference proceedings conference paper supplement (https://openreview.net/forum?id=Zd4hTGjpMNm)
Supplement: supplementary_material [file attachment]

## A EXPERIMENTAL SETTINGS

In this section, we introduce the details of the settings in our experiments. Firstly, Table 7 is the number of neural datasets from three brain regions and Fig. 5 illustrates the training image of the neural stimuli. Secondly, the Table 8 and Table 9 are the settings of the hyperparameters for image reconstruction and neural similarity experiments, respectively. Thirdly, the Table 10 is the setting of the hyperparameters of different DAE-NR variants for image reconstruction experiments for image reconstruction on region 3. Fourthly, the Table 11, Table 12 and Table 13 are the settings the hyperparameters of different DAE-NR variants for neural similarity experiments on Region 1, 2 and 3, respectively.

Table 7: The neural dataset containing neural responses in three brain regions under visual stimulation Antolik et al. (2016). The number in bracket is the repeated times.

|          | Number of train images | Number of test images | Number of neurons |
|----------|------------------------|-----------------------|-------------------|
| Region 1 | 1800 (1)               | 50 (10)               | 103               |
| Region 2 | 1260 (1)               | 50 (8)                | 55                |
| Region 3 | 1800 (1)               | 50 (12)               | 102               |

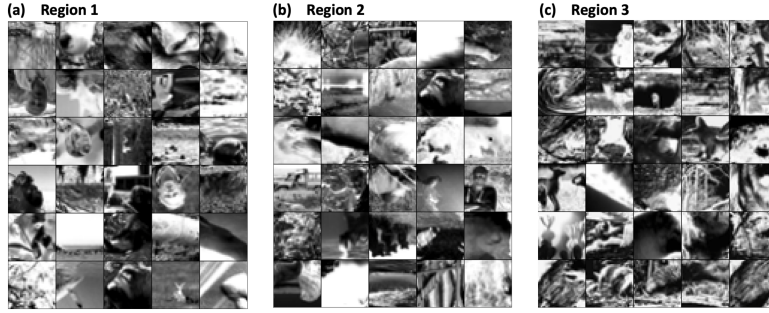

Figure 5: The examples of training stimuli in each brain region.

Table 8: The settings of the hyperparameters for image reconstruction experiments.

|                     | Region 1         | Region 2         | Region 3         |
|---------------------|------------------|------------------|------------------|
| Models              | $\alpha : \beta$ | $\alpha : \beta$ | $\alpha : \beta$ |
| CAE-FR <sub>1</sub> | 1e-0:1e-5        | 1e-0:1e-3        | 1e-0:1e-4        |
| CAE-FR <sub>2</sub> | 1e-0:1e-5        | 1e-0:1e-4        | 1e-0:1e-3        |
| CAE-FR <sub>3</sub> | 1e-0:1e-4        | 1e-0:1e-3        | 1e-0:1e-5        |
| CAE-FR <sub>4</sub> | 1e-0:1e-5        | 1e-0:1e-4        | 1e-0:1e-4        |

## B ADDITIONAL EXPERIMENTS

In this section, we provide results from additional experiments. Fig. 6 and Fig. 7 display the results of image reconstruction using the neural responses on the region 1 and 2. Fig. 8 shows the number of significant neurons and insignificant neurons of regions 1 and 2 in the image reconstruction experiments, respectively.

Table 9: The settings the hyperparameters for neural similarity experiments.

|                     | Region 1         | Region 2         | Region 3         |
|---------------------|------------------|------------------|------------------|
| Models              | $\alpha : \beta$ | $\alpha : \beta$ | $\alpha : \beta$ |
| CAE-FR <sub>1</sub> | 1e-0:9e-1        | 7e-1:1e-0        | 8e-1:1e-0        |
| CAE-FR <sub>2</sub> | 7e-1:1e-0        | 1e-0:1e-2        | 4e-1:1e-0        |
| CAE-FR <sub>3</sub> | 1e-0:6e-1        | 1e-4:1e-0        | 1e-0:4e-1        |
| CAE-FR <sub>4</sub> | 1e-0:9e-1        | 1e-0:1e-2        | 1e-0:9e-1        |

Table 10: The settings the hyperparameters of different DAE-NR variants for image reconstruction experiments on region 3.

|           | $h_1$            | $h_2$            | $h_3$            | $h_4$            |
|-----------|------------------|------------------|------------------|------------------|
| Models    | $\alpha : \beta$ | $\alpha : \beta$ | $\alpha : \beta$ | $\alpha : \beta$ |
| CAE-FR    | 1e-0:1e-4        | 1e-0:5e-3        | 1e-0:1e-3        | 1e-0:1e-3        |
| CAE-FC    | 1e-0:1e-4        | 1e-0:1e-4        | 1e-0:1e-4        | 1e-0:1e-4        |
| CAE-FM    | 1e-0:2e-1        | 1e-0:1e-3        | 1e-0:1e-4        | 1e-0:1e-4        |
| VAE-FR    | 1e-0:2e-2        | 1e-0:1e-2        | 1e-0:2e-1        | 1e-0:5e-3        |
| VAE-FC    | 1e-0:1e-2        | 1e-0:5e-3        | 1e-0:1e-3        | 1e-0:1e-1        |
| VAE-FM    | 1e-0:5e-3        | 1e-0:5e-2        | 1e-0:2e-1        | 1e-0:5e-3        |
| VQ-VAE-FR | 1e-0:2e-2        | 1e-0:2e-1        | 1e-0:1e-2        | 1e-0:1e-3        |
| VQ-VAE-FC | 1e-0:1e-3        | 1e-0:1e-4        | 1e-0:1e-4        | 1e-0:1e-4        |
| VQ-VAE-FM | 1e-0:2e-1        | 1e-0:1e-3        | 1e-0:1e-2        | 1e-0:1e-3        |

Table 11: The settings the hyperparameters of different DAE-NR variants for neural similarity experiments on Region 1

|           | $h_1$            | $h_2$            | $h_3$            | $h_4$            |
|-----------|------------------|------------------|------------------|------------------|
| Models    | $\alpha : \beta$ | $\alpha : \beta$ | $\alpha : \beta$ | $\alpha : \beta$ |
| CAE-FR    | 1e-0:5e-1        | 1e-0:5e-2        | 1e-0:5e-2        | 1e-0:1e-2        |
| VAE-FR    | 1e-3:1e-0        | 2e-2:1e-0        | 1e-3:1e-0        | 1e-1:1e-0        |
| VQ-VAE-FR | 1e-0:2e-2        | 1e-0:2e-1        | 1e-0:5e-3        | 1e-0:2e-1        |
| CAE-FC    | 5e-3:1e-0        | 1e-3:1e-0        | 2e-2:1e-0        | 1e-2:1e-0        |
| VAE-FC    | 2e-2:1e-0        | 1e-0:1e-2        | 2e-1:1e-0        | 1e-3:1e-0        |
| VQ-VAE-FC | 1e-0:1e-1        | 1e-0:5e-1        | 1e-4:1e-0        | 1e-2:1e-0        |
| CAE-FM    | 1e-2:1e-0        | 5e-1:1e-0        | 1e-0:1e-1        | 1e-0:5e-1        |
| VAE-FM    | 1e-4:1e-0        | 1e-3:1e-0        | 1e-1:1e-0        | 1e-1:1e-0        |
| VQ-VAE-FM | 1e-1:1e-0        | 1e-1:1e-0        | 1e-0:1e-2        | 1e-0:1e-0        |

Table 12: The settings the hyperparameters of different DAE-NR variants for neural similarity experiments on Region 2

|           | $h_1$            | $h_2$            | $h_3$            | $h_4$            |
|-----------|------------------|------------------|------------------|------------------|
| Models    | $\alpha : \beta$ | $\alpha : \beta$ | $\alpha : \beta$ | $\alpha : \beta$ |
| CAE-FR    | 1e-0:2e-1        | 1e-0:2e-2        | 5e-3:1e-0        | 1e-0:5e-3        |
| VAE-FR    | 5e-3:1e-0        | 2e-1:1e-0        | 5e-2:1e-0        | 5e-1:1e-0        |
| VQ-VAE-FR | 1e-0:1e-1        | 2e-1:1e-0        | 1e-0:1e-2        | 1e-0:2e-1        |
| CAE-FC    | 1e-2:1e-0        | 5e-3:1e-0        | 1e-0:5e-2        | 1e-4:1e-0        |
| VAE-FC    | 1e-2:1e-0        | 5e-3:1e-0        | 1e-0:5e-1        | 1e-4:1e-0        |
| VQ-VAE-FC | 1e-0:1e-0        | 5e-3:1e-0        | 1e-3:1e-0        | 1e-3:1e-0        |
| CAE-FM    | 1e-0:1e-1        | 1e-0:1e-2        | 1e-0:5e-3        | 1e-0:5e-3        |
| VAE-FM    | 5e-2:1e-0        | 1e-4:1e-0        | 5e-3:1e-0        | 2e-2:1e-0        |
| VQ-VAE-FM | 1e-0:5e-2        | 5e-2:1e-0        | 1e-0:1e-1        | 1e-0:5e-1        |

Table 13: The settings the hyperparameters of different DAE-NR variants for neural similarity experiments on Region 3

|                        | $h_1$            | $h_2$            | $h_3$            | $h_4$            |
|------------------------|------------------|------------------|------------------|------------------|
| Models                 | $\alpha : \beta$ | $\alpha : \beta$ | $\alpha : \beta$ | $\alpha : \beta$ |
| CAE-FR                 | 1e-0:1e-1        | 1e-0:1e-0        | 1e-0:5e-2        | 1e-0:1e-2        |
| VAE-FR                 | 1e-0:1e-4        | 5e-1:1e-0        | 1e-2:1e-0        | 1e-0:1e-0        |
| VQ-VAE-FR              | 1e-0:2e-1        | 1e-0:2e-2        | 1e-0:1e-0        | 1e-4:1e-0        |
| CAE-FC                 | 1e-0:2e-1        | 5e-2:1e-0        | 1e-0:1e-1        | 1e-0:2e-1        |
| VAE-FC                 | 1e-3:1e-0        | 1e-2:1e-0        | 5e-3:1e-0        | 2e-1:1e-0        |
| VQ-VAE-FC              | 1e-1:1e-0        | 1e-3:1e-0        | 1e-2:1e-0        | 1e-4:1e-0        |
| CAE-FM                 | 5e-3:1e-0        | 1e-0:5e-3        | 1e-0:5e-1        | 1e-2:1e-0        |
| VAE-FM                 | 1e-3:1e-0        | 1e-0:2e-1        | 2e-2:1e-0        | 5e-2:1e-0        |
| VQ-VAE-FM <sub>4</sub> | 1e-0:5e-1        | 1e-4:1e-0        | 1e-3:1e-0        | 1e-3:1e-0        |

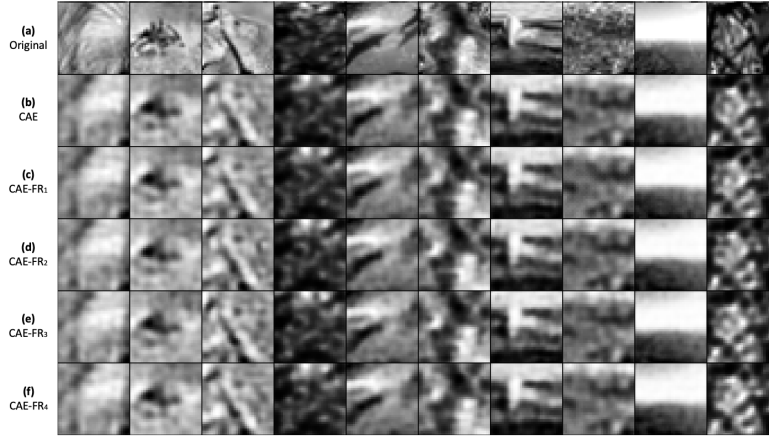Figure 6: The reconstructed images with neurons in Region 1. From top to bottom, each row displays the original images (a), the images reconstructed by CAE (b), CAE-FR<sub>1</sub> (c), CAE-F<sub>2</sub> (d), CAE-F<sub>3</sub> (e), CAE-FR<sub>4</sub> (f), respectively.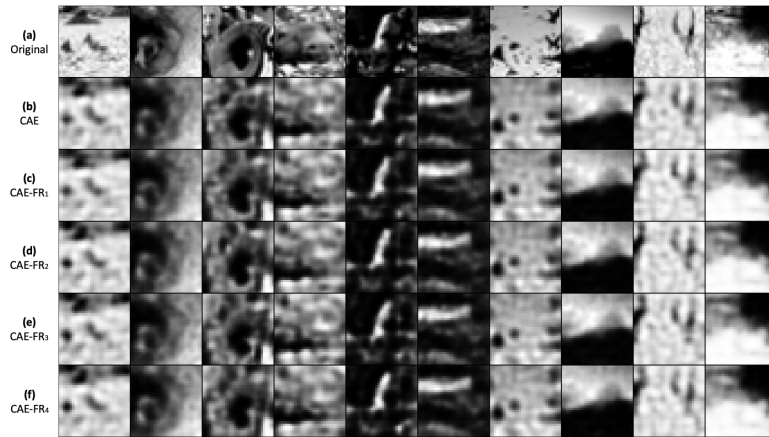Figure 7: The reconstructed images with neurons in Region 2. From top to bottom, each row displays the original images (a), the images reconstructed by CAE (b), CAE-FR<sub>1</sub> (c), CAE-F<sub>2</sub> (d), CAE-F<sub>3</sub> (e), CAE-FR<sub>4</sub> (f), respectively.

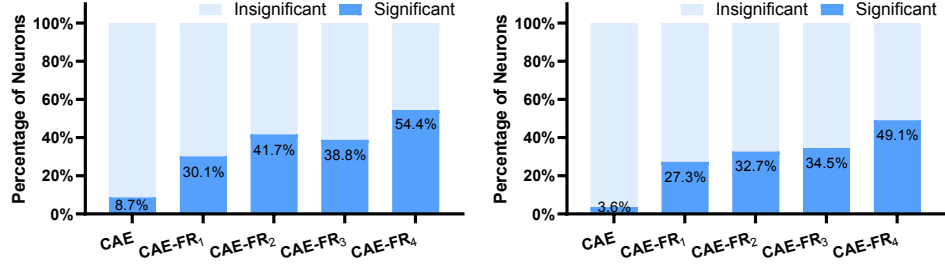

Figure 8: The number of significant neurons and insignificant neurons in region 1 and 2 in the image reconstruction experiments. The threshold for significance is  $p \leq 0.05$ .

Table 14: Network architecture. This architecture was used for DAE-NR.

| Operation     | kernel       | stride       | Features |
|---------------|--------------|--------------|----------|
| Convolution   | $3 \times 3$ | $2 \times 2$ | 32       |
| Convolution   | $3 \times 3$ | $1 \times 1$ | 32       |
| Convolution   | $3 \times 3$ | $2 \times 2$ | 32       |
| Convolution   | $3 \times 3$ | $1 \times 1$ | 32       |
| Deconvolution | $3 \times 3$ | $1 \times 1$ | 32       |
| Deconvolution | $3 \times 3$ | $2 \times 2$ | 32       |
| Deconvolution | $3 \times 3$ | $1 \times 1$ | 32       |
| Deconvolution | $3 \times 3$ | $2 \times 2$ | 1        |
